# Supplementary material for: Obesity, but not hypohydration, mediates changes in mental task load during passive heating in females
Source: PeerJ. 2018 Aug 16;6:e5394. doi: 10.7717/peerj.5394 (PMC6098944; doi:10.7717/peerj.5394)
Supplement: Supplemental Information 2 — The data in this set includes physiological data (heart rate, skin temperature, etc). [file peerj-06-5394-s002.xlsx]

## Sheet: Physiological Data
Subject#	GROUP	RHBASELINE_EUHY	RH1.0_EUHY	RHBASELINE_DEHY	RH1.0_DEHY	TCBASELINE_AVG_EUHY	TC1.0_AVG_EUHY	Tcchangefrombaselineto1.0	MeanSkinTempBASELINE_EUHY	MeanSkinTemp1.0_EUHY	MeanBodyTempBASELINE_EUHY	MeanBodyTemp1.0_EUHY	HR_BASE_EUHY	HR_1.0_EUHY	Ta_BASE_EUHY	Ta_1.0_EUHY	TCBASELINE_AVG_DY	TC1.0_AVG_DY	Tcchangefrombaselineto1.0_A	MeanSkinBASELINE_DY	MeanSkin1.0_DY	MeanBodyTempBASELINE_DY	MeanBodyTemp1.0_DY	HR_BASE_DY	HR_1.0_DY	Ta_BASE_DY	Ta_1.0_DY
2	1	31	32	30	28	36.9442	37.8175	0.8733	34.7506	38.5594	36.7248	37.8917	63.7789	95.8821	32.7994	34.4722	36.7529	37.7521	0.9992	35.4575	37.825	36.6234	37.7594	66.339	95.6314	35.644	36.0071
3	1	32	31	30	31	36.5787	37.5003	0.9216	34.3489	37.9677	36.3557	37.547	63.1598	99.5696	32.9652	35.1492	36.6896	37.6787	0.9891	35.0724	38.2574	36.5279	37.7366	54.5948	88.9894	34.1276	34.1053
4	1	33	31	30	30	36.865	37.8229	0.9579	34.8136	37.8423	36.6599	37.8248	73.9821	94.9115	32.6918	34.8653	36.8259	37.8393	1.0134	35.1693	39.0941	36.6602	37.9648	60.3826	98.3708	34.9865	35.0554
5	1	32	33	30	31	37.1654	38.026	0.8606	34.975	38.0955	36.9464	38.033	62.1826	105.843	33.4791	35.1801	37.2014	38.1758	0.9744	35.0411	38.4542	36.9854	38.2036	62.5862	108.237	35.7724	35.8092
7	1	31	31	30	30	36.5509	37.4816	0.9307	34.978	37.6744	36.3936	37.5009	63.8989	103.578	34.2855	35.2628	36.6188	37.5966	0.9778	34.9975	37.7217	36.4567	37.6091	64.2807	99.1501	34.5779	34.399
8	1	31	32	30	30	36.4383	37.4144	0.9761	35.5583	36.3177	36.3503	37.3047	62.1731	86.8858	33.5639	34.3599	36.4306	37.4488	1.0182	35.164	37.6395	36.3039	37.4679	80.0203	87.2445	35.1948	35.3455
10	1	31	30	29	29	37.1029	38.0999	0.997	35.713	37.2209	36.9639	38.012	67.7034	100	34.0389	34.4764	37.2397	38.2648	1.0251	35.5576	38.1753	37.0715	38.2559	79	114	34.5593	34.5444
11	1	32	31	30	30	36.7372	37.7495	1.0123	34.6136	37.716	36.5248	37.7462	54.8508	93	32.7163	35.2668	36.9614	37.9633	1.0019	35.5546	37.2591	36.8207	37.8929	71	100	34.4679	34.4494
12	1	30	30	31	30	36.7411	37.7053	0.9642	36.0633	36.5801	36.6733	37.5928	59	84	34.0757	34.7505	36.6524	37.6371	0.9847	35.4549	36.7754	36.5327	37.5509	59	94	34.9579	34.7999
13	1	32	31	30	31	37.029	38.0195	0.9905	35.1939	38.2084	36.8455	38.0384	61	93	33.297	34.8503	36.9118	37.9112	0.9994	36.1297	38.1367	36.8336	37.9338	61	99	35.1641	34.7859
14	1	31	30	31	30	36.3197	37.3329	1.0132	35.0765	37.654	36.1954	37.365	70	82	34.1672	34.6038	36.8056	37.803	0.9974	35.4183	37.5446	36.6669	37.7772	61	94	34.4236	34.4724
100	2	31	30	31	33	36.6889	37.6834	0.9945	35.4732	36.5157	36.5673	37.5666	62	89	33.1427	34.2111	37.2253	38.2218	0.9965	36.5457	37.6354	37.1573	38.1632	60.1581	97.7394	35.1075	35.3125
300	2	32	31	31	30	36.0947	37.0944	0.9997	34.3445	37.1037	35.9197	37.0953	57	81	33.2822	34.9238	36.4	37.34	0.94	35.8939	36.8456	36.3494	37.2906	71.4658	96.9731	34.1266	34.1132
500	2	31	32	30	29	37.0096	37.9904	0.9808	35.2364	38.2969	36.8323	38.0211	73	97	34.027	35.7726	37.3007	38.299	0.9983	35.9962	38.7003	37.1703	38.3391	82	103	35.4692	36.0518
700	2	31	31	29	29	36.8716	37.8839	1.0123	34.1256	38.0173	36.597	37.8972	84	115	33.5963	35.5628	36.7184	37.7122	0.9938	34.9127	38.325	36.5378	37.7735	77	106	35.9035	36.056
900	2	31	31	30	30	36.7869	37.7771	0.9902	34.9423	38.4398	36.6024	37.8434	56	97	34.3035	34.5115	36.847	37.8429	0.9959	35.1311	40.29	36.6754	38.0876	67	93	35.1311	34.6616
1000	2	33	31	31	30	37.1153	38.1096	0.9943	35.2024	38.7091	36.924	38.1696	80	121	34.005	35.3186	37.3983	38.3966	0.9983	35.4196	38.9757	37.2004	38.4545	86	126	34.7736	34.9942
1100	2	31	31	30	30	36.5348	37.4898	0.955	34.9113	37.1357	36.3724	37.4544	78.1472	111.361	33.3147	34.3349	36.4561	37.4352	0.9791	34.9165	37.206	36.3021	37.4123	79.9932	107.445	34.8262	34.9585
1200	2	33	31	31	30	36.8235	37.8091	0.9856	34.7881	37.7026	36.62	37.7985	76.4455	109.565	34.0356	35.2014	37.0605	38.0524	0.9919	34.7742	38.2049	36.8319	38.0677	88.3879	114.996	34.7998	35.1067
1300	2	#NULL!	32	30	30	37.5456	38.4263	0.8807	35.4919	38.562	37.3402	38.4399	73.7023	121.826	33.6685	35.6053	37.1637	38.1237	0.96	35.6854	38.2832	37.0159	38.1396	75.7981	116.75	34.6188	34.5446
1400	2	30	29	30	30	36.3066	37.3038	0.9972	35.1482	36.9909	36.1908	37.2725	56	96	34.2476	34.4429	36.1183	37.1119	0.9936	35.0147	38.2739	36.0079	37.2281	62	97	34.9227	34.4056
