# Supplementary material for: Obesity, but not hypohydration, mediates changes in mental task load during passive heating in females
Source: PeerJ. 2018 Aug 16;6:e5394. doi: 10.7717/peerj.5394 (PMC6098944; doi:10.7717/peerj.5394)
Supplement: Supplemental Information 3 — Data included in this dataset includes data for the analyses of cognitive performance, mood state, and mental task load. [file peerj-06-5394-s003.xlsx]

## Sheet: Dataset Cognitive Mood and Ment
Subject	AGE	HEIGHT	WEIGHT	BF	GROUP	BM_MONTH1	BM_MONTH2	EU_MemoryCOMPVerbal	EU_MemoryCOMPVisual	EU_MemoryCOMPMotorVisual	EU_ReactionTimeCOMP	EU_ImpulseControlCOMP	EU_Total_Symptom_Score	EUHT_MemoryCOMPVerbal	EUHT_MemoryCOMPVisual	EUHT_VisualMotorCOMP	EUHT_ReactionTimeCOMP	EUHT_ImpulseControlCOMP	EUHT_Total_Symptom_Score	Bmpre_EU	Bmpost_EU	BMlossfromHOMESCALE_EU	BMloss_duringtrial_EU	Bmlossfrombaseline_EU	USGpre_EU	USGpost_EU	UOSMpre_AVERAGE_EU	UOSMpost_AVERAGE_EU	BL_SOSM_AVERAGE_EU	@0.5_SOSM_AVERAGE_EU	@1.0_SOSM_AVERAGE_EU	DY_MemoryCOMPVerbal	DY_MemoryCOMPVisual	DY_VisualCOMPMotor	DY_ReactionTimeCOMP	DY_ImpulseControlCOMP	DY_Total_Symptom_Score	DYHT_MemoryCOMPVerbal	DYHT_MemoryCOMPVisual	DYHT_VisualMotorCOMP	DYHT_ReactionTimeCOMP	DYHT_ImpulseControlCOMP	DYHT_Total_Symptom_Score	Bmpre_DY	Bmpost_DY	BMlossfromHOMESCALE_dy	BMloss_duringtrial_dy	Bmlossfrombaseline_dy	Total_Time_heated_dy
2	23	164.5	57.1	28.7	1	58	.	83	82	47.78	0.56	7	10	96	80	39.22	0.63	4	10	57.7	57.4	-0.517241	-0.519931	-1.03448	1.002	1.006	137.5	326.5	284	286	283.5	79	73	39.33	0.59	8	27	66	93	49.58	0.56	10	24	56.9	56.3	-1.89655	-1.05448	-2.93103	1.5
3	27	156	54.6	23.3	1	.	54.279	99	73	39.17	0.67	2	7	100	91	36.3	0.67	1	13	54.8	54.2	0.957996	-1.09489	-0.147384	1.001	1.006	98	333.5	287.5	289	289	100	71	31.78	0.67	1	8	96	76	36.45	0.69	2	17	53.8	52.9	-0.884304	-1.67286	-2.54237	1.66
4	21	171	66.4	24.6	1	65.06	.	86	86	45.8	0.53	3	0	85	54	41.7	0.5	5	0	65.8	65.7	1.13741	-0.151976	0.983707	1.005	1.01	233.5	439.5	283	287	286	96	78	47.85	0.57	6	0	89	71	44.45	0.54	5	0	65	64.2	-0.0922226	-1.23077	-1.32186	1.92
5	23	159.4	64.8	30	1	64.099999999999994	.	96	100	39.78	0.48	5	0	88	84	48.05	0.5	6	2	64.6	63.8	0.780031	-1.23839	-0.468019	1.005	1.01	204	371	282.5	289	285.5	93	78	51.18	0.47	7	0	81	78	43.2	0.47	9	2	63.5	62.4	-0.936037	-1.73228	-2.65211	1.75
7	21	170	61.2	29.1	1	60.53	61.4	90	80	45.03	0.53	11	4	76	90	46.05	0.56	16	0	60.6	60.1	0.115645	-0.825083	-0.710392	1.01	1.01	329	307	281	285.5	281.5	96	82	44.58	0.58	19	0	78	72	43.95	0.6	25	11	60.5	59.7	-1.4658	-1.32231	-2.76873	1.92
8	22	173.5	65	25.1	1	65.099999999999994	.	100	72	47.63	0.53	2	2	93	84	48.1	0.5	13	2	66.7	65.8	2.45776	-1.34933	1.07527	1.016	1.006	696.5	328.5	283.5	281.5	279	98	80	46.95	0.51	10	4	99	57	41.58	0.55	5	3	65.2	64.5	0.15361	-1.07362	-0.921659	1.75
10	18	161.4	54.8	26.9	1	54.6	.	70	74	29.55	0.58	7	3	93	55	33.85	0.51	3	5	55.2	54.4	1.0989	-1.44928	-0.3663	1.01	1.01	399	380.5	286.5	286	281.5	89	80	38.63	0.52	5	1	87	71	40.1	0.51	9	6	53.5	52.6	-2.01465	-1.68224	-3.663	2.42
11	23	169	62.1	24	1	62.225000000000001	.	99	71	47.7	0.54	7	8	95	73	44.72	0.53	7	17	62.1	61.7	-0.200884	-0.644122	-0.843712	1.006	1.016	279	584.5	284.5	286	284	88	69	44.53	0.61	8	9	83	64	43.53	0.56	5	22	61.8	61.1	-0.683005	-1.13269	-1.80796	1.75
12	25	162.8	61.3	30.1	1	62.2	.	96	55	36.53	0.63	1	3	80	61	43.75	0.62	5	4	62.6	62.3	0.643087	-0.479233	0.160772	1.017	1.012	619.5	553.5	288	288.5	284	97	67	38.5	0.56	6	3	79	63	35.13	0.6	7	17	61	60.1	-1.92926	-1.47541	-3.37621	1.83
13	21	163	53	18.6	1	53.3	.	91	82	48.5	0.51	4	1	72	72	45.93	0.52	5	0	53.2	52.1	-0.187617	-2.06767	-2.25141	1.002	1.01	82.5	352	282	288	291	90	73	49.25	0.53	7	1	75	66	48	0.55	10	0	52.2	51	-2.06379	#NULL!	#NULL!	1.5
14	21	158.2	54.9	19.8	1	55	.	99	94	40.22	0.56	6	4	96	98	36.75	0.55	8	7	54.2	53.8	-1.45455	-0.738007	-2.18182	1.007	1.008	266	311.5	284.5	286.5	285	99	84	34.83	0.54	8	17	82	76	36.73	0.58	13	50	53.8	52.8	-0.92081	-1.85874	-2.76243	1.66
100	24	169	117	50.5	2	117.35	.	85	90	34.53	0.66	8	2	100	88	34.3	0.74	2	1	116.7	116.3	-0.553899	-0.342759	-0.894759	1.007	1.014	272.5	559.333	283	285	284.5	100	61	36.98	0.6	12	2	96	76	37.73	0.51	10	8	115.3	113.5	-1.83057	-1.56114	-3.36313	2.5
300	21	161.2	62.5	39.1	2	63	62	100	86	37.15	0.73	2	2	100	88	29.13	0.63	3	2	60.9	60.9	-3.33333	0	-3.33333	1.012	1.006	368	196	282.5	282.333	281.333	100	95	40.3	0.64	3	3	85	95	34.67	0.64	2	6	62.1	61.9	0.16129	-0.322061	-1.74603	1.66
500	25	159.5	89.6	41.8	2	89.7	.	96	83	46.13	0.56	4	15	95	85	47.4	0.55	6	18	89.8	89.4	0.111483	-0.445434	-0.334448	1.019	1.02	693	658	281	282.5	280	99	77	48.85	0.55	2	5	80	90	43.22	0.58	1	39	90.1	88.9	0.445931	-1.33185	-0.891862	1.92
700	22	160.6	88.3	51.4	2	88.025000000000006	.	97	65	36	0.61	3	15	77	60	41.1	0.77	8	11	87.9	87.6	-0.142005	-0.341297	-0.482817	1.01	1.024	358	871.5	286.5	287	282	89	52	38.42	0.57	3	14	79	61	40	0.59	2	32	87.2	86.4	-0.937234	-0.917431	-1.84607	1.75
900	21	159	67.1	40.1	2	67.8	67.099	96	88	43.2	0.53	7	0	89	70	41.7	0.54	7	1	68.6	68.4	1.17994	-0.291545	0.884956	1.003	1.008	145	352	287.5	284.5	283	100	59	44.58	0.58	8	0	100	79	44.78	0.59	5	1	66.5	66.1	-1.9174	-0.601504	-2.50737	1.75
1000	21	165	88.9	52	2	89	.	98	85	39.67	0.51	11	1	90	76	38.5	0.53	16	2	88.1	88.2	-1.01124	0.113507	-0.898876	1	1.004	64.5	213	284	286	282.667	95	86	37.75	0.56	8	3	90	65	36.98	0.53	11	3	87.1	86.1	-2.13483	-1.14811	-3.25843	2.25
1100	21	150	64.9	40.3	2	64.5	.	65	90	27.7	0.74	12	0	78	51	26.85	0.7	10	15	65	64.8	0.775194	-0.307692	0.465116	1.012	1.014	590.5	584.5	279	280.5	277.333	69	69	29.55	0.82	15	21	89	50	26.13	0.67	5	23	63.8	63.5	-1.08527	-0.470219	-1.55039	1.75
1200	29	165.5	91.5	47.8	2	90.28	.	88	65	34.8	0.58	4	1	85	64	30.58	0.59	1	6	89.4	89.4	-0.974745	0	-0.974745	1.014	1.016	574	640.5	285.5	284.5	281	78	63	32.28	0.66	4	17	79	60	32.92	0.61	5	24	89.7	88.8	-0.642446	-1.00334	-1.63934	2
1300	21	160.8	73.9	40	2	72.832999999999998	73.3	81	92	41.35	0.55	7	5	64	50	46.9	0.51	7	7	72.6	#NULL!	-0.31991	#NULL!	#NULL!	1.009	#NULL!	328	#NULL!	280	283.5	279	92	78	47.18	0.58	6	11	67	58	45.18	0.54	4	10	72.9	72.2	-0.545703	-0.960219	-1.50068	2
1400	22	164	54.5	41.6	2	70	.	93	67	37.6	0.53	6	6	91	58	43.83	0.49	3	2	69.9	69.5	-0.142857	-0.572246	-0.714286	1.006	1.002	229.5	121.5	285	285.5	279.5	88	55	34.48	0.59	7	17	88	57	40	0.55	8	8	69.2	68.9	-1.14286	-0.433526	-1.57143	1.5
#NULL!	#NULL!	#NULL!	#NULL!	#NULL!	#NULL!			#NULL!	#NULL!	#NULL!	#NULL!	#NULL!	#NULL!	#NULL!	#NULL!	#NULL!	#NULL!	#NULL!	#NULL!	#NULL!	#NULL!	#NULL!	#NULL!	#NULL!	#NULL!	#NULL!	#NULL!	#NULL!	#NULL!	#NULL!	#NULL!	#NULL!	#NULL!	#NULL!	#NULL!	#NULL!	#NULL!	#NULL!	#NULL!	#NULL!	#NULL!	#NULL!	#NULL!	#NULL!	#NULL!	#NULL!	#NULL!	#NULL!	#NULL!
#NULL!	#NULL!	#NULL!	#NULL!	#NULL!	#NULL!			#NULL!	#NULL!	#NULL!	#NULL!	#NULL!	#NULL!	#NULL!	#NULL!	#NULL!	#NULL!	#NULL!	#NULL!	#NULL!	#NULL!	#NULL!	#NULL!	#NULL!	#NULL!	#NULL!	#NULL!	#NULL!	#NULL!	#NULL!	#NULL!	#NULL!	#NULL!	#NULL!	#NULL!	#NULL!	#NULL!	#NULL!	#NULL!	#NULL!	#NULL!	#NULL!	#NULL!	#NULL!	#NULL!	#NULL!	#NULL!	#NULL!	#NULL!
#NULL!	#NULL!	#NULL!	#NULL!	#NULL!	#NULL!			#NULL!	#NULL!	#NULL!	#NULL!	#NULL!	#NULL!	#NULL!	#NULL!	#NULL!	#NULL!	#NULL!	#NULL!	#NULL!	#NULL!	#NULL!	#NULL!	#NULL!	#NULL!	#NULL!	#NULL!	#NULL!	#NULL!	#NULL!	#NULL!	#NULL!	#NULL!	#NULL!	#NULL!	#NULL!	#NULL!	#NULL!	#NULL!	#NULL!	#NULL!	#NULL!	#NULL!	#NULL!	#NULL!	#NULL!	#NULL!	#NULL!	#NULL!
#NULL!	#NULL!	#NULL!	#NULL!	#NULL!	#NULL!			#NULL!	#NULL!	#NULL!	#NULL!	#NULL!	#NULL!	#NULL!	#NULL!	#NULL!	#NULL!	#NULL!	#NULL!	#NULL!	#NULL!	#NULL!	#NULL!	#NULL!	#NULL!	#NULL!	#NULL!	#NULL!	#NULL!	#NULL!	#NULL!	#NULL!	#NULL!	#NULL!	#NULL!	#NULL!	#NULL!	#NULL!	#NULL!	#NULL!	#NULL!	#NULL!	#NULL!	#NULL!	#NULL!	#NULL!	#NULL!	#NULL!	#NULL!
#NULL!	#NULL!	#NULL!	#NULL!	#NULL!	#NULL!			#NULL!	#NULL!	#NULL!	#NULL!	#NULL!	#NULL!	#NULL!	#NULL!	#NULL!	#NULL!	#NULL!	#NULL!	#NULL!	#NULL!	#NULL!	#NULL!	#NULL!	#NULL!	#NULL!	#NULL!	#NULL!	#NULL!	#NULL!	#NULL!	#NULL!	#NULL!	#NULL!	#NULL!	#NULL!	#NULL!	#NULL!	#NULL!	#NULL!	#NULL!	#NULL!	#NULL!	#NULL!	#NULL!	#NULL!	#NULL!	#NULL!	#NULL!
#NULL!	#NULL!	#NULL!	#NULL!	#NULL!	#NULL!			#NULL!	#NULL!	#NULL!	#NULL!	#NULL!	#NULL!	#NULL!	#NULL!	#NULL!	#NULL!	#NULL!	#NULL!	#NULL!	#NULL!	#NULL!	#NULL!	#NULL!	#NULL!	#NULL!	#NULL!	#NULL!	#NULL!	#NULL!	#NULL!	#NULL!	#NULL!	#NULL!	#NULL!	#NULL!	#NULL!	#NULL!	#NULL!	#NULL!	#NULL!	#NULL!	#NULL!	#NULL!	#NULL!	#NULL!	#NULL!	#NULL!	#NULL!
#NULL!	#NULL!	#NULL!	#NULL!	#NULL!	#NULL!			#NULL!	#NULL!	#NULL!	#NULL!	#NULL!	#NULL!	#NULL!	#NULL!	#NULL!	#NULL!	#NULL!	#NULL!	#NULL!	#NULL!	#NULL!	#NULL!	#NULL!	#NULL!	#NULL!	#NULL!	#NULL!	#NULL!	#NULL!	#NULL!	#NULL!	#NULL!	#NULL!	#NULL!	#NULL!	#NULL!	#NULL!	#NULL!	#NULL!	#NULL!	#NULL!	#NULL!	#NULL!	#NULL!	#NULL!	#NULL!	#NULL!	#NULL!
#NULL!	#NULL!	#NULL!	#NULL!	#NULL!	#NULL!			#NULL!	#NULL!	#NULL!	#NULL!	#NULL!	#NULL!	#NULL!	#NULL!	#NULL!	#NULL!	#NULL!	#NULL!	#NULL!	#NULL!	#NULL!	#NULL!	#NULL!	#NULL!	#NULL!	#NULL!	#NULL!	#NULL!	#NULL!	#NULL!	#NULL!	#NULL!	#NULL!	#NULL!	#NULL!	#NULL!	#NULL!	#NULL!	#NULL!	#NULL!	#NULL!	#NULL!	#NULL!	#NULL!	#NULL!	#NULL!	#NULL!	#NULL!
#NULL!	#NULL!	#NULL!	#NULL!	#NULL!	#NULL!			#NULL!	#NULL!	#NULL!	#NULL!	#NULL!	#NULL!	#NULL!	#NULL!	#NULL!	#NULL!	#NULL!	#NULL!	#NULL!	#NULL!	#NULL!	#NULL!	#NULL!	#NULL!	#NULL!	#NULL!	#NULL!	#NULL!	#NULL!	#NULL!	#NULL!	#NULL!	#NULL!	#NULL!	#NULL!	#NULL!	#NULL!	#NULL!	#NULL!	#NULL!	#NULL!	#NULL!	#NULL!	#NULL!	#NULL!	#NULL!	#NULL!	#NULL!
#NULL!	#NULL!	#NULL!	#NULL!	#NULL!	#NULL!			#NULL!	#NULL!	#NULL!	#NULL!	#NULL!	#NULL!	#NULL!	#NULL!	#NULL!	#NULL!	#NULL!	#NULL!	#NULL!	#NULL!	#NULL!	#NULL!	#NULL!	#NULL!	#NULL!	#NULL!	#NULL!	#NULL!	#NULL!	#NULL!	#NULL!	#NULL!	#NULL!	#NULL!	#NULL!	#NULL!	#NULL!	#NULL!	#NULL!	#NULL!	#NULL!	#NULL!	#NULL!	#NULL!	#NULL!	#NULL!	#NULL!	#NULL!
#NULL!	#NULL!	#NULL!	#NULL!	#NULL!	#NULL!			#NULL!	#NULL!	#NULL!	#NULL!	#NULL!	#NULL!	#NULL!	#NULL!	#NULL!	#NULL!	#NULL!	#NULL!	#NULL!	#NULL!	#NULL!	#NULL!	#NULL!	#NULL!	#NULL!	#NULL!	#NULL!	#NULL!	#NULL!	#NULL!	#NULL!	#NULL!	#NULL!	#NULL!	#NULL!	#NULL!	#NULL!	#NULL!	#NULL!	#NULL!	#NULL!	#NULL!	#NULL!	#NULL!	#NULL!	#NULL!	#NULL!	#NULL!
#NULL!	#NULL!	#NULL!	#NULL!	#NULL!	#NULL!			#NULL!	#NULL!	#NULL!	#NULL!	#NULL!	#NULL!	#NULL!	#NULL!	#NULL!	#NULL!	#NULL!	#NULL!	#NULL!	#NULL!	#NULL!	#NULL!	#NULL!	#NULL!	#NULL!	#NULL!	#NULL!	#NULL!	#NULL!	#NULL!	#NULL!	#NULL!	#NULL!	#NULL!	#NULL!	#NULL!	#NULL!	#NULL!	#NULL!	#NULL!	#NULL!	#NULL!	#NULL!	#NULL!	#NULL!	#NULL!	#NULL!	#NULL!
#NULL!	#NULL!	#NULL!	#NULL!	#NULL!	#NULL!			#NULL!	#NULL!	#NULL!	#NULL!	#NULL!	#NULL!	#NULL!	#NULL!	#NULL!	#NULL!	#NULL!	#NULL!	#NULL!	#NULL!	#NULL!	#NULL!	#NULL!	#NULL!	#NULL!	#NULL!	#NULL!	#NULL!	#NULL!	#NULL!	#NULL!	#NULL!	#NULL!	#NULL!	#NULL!	#NULL!	#NULL!	#NULL!	#NULL!	#NULL!	#NULL!	#NULL!	#NULL!	#NULL!	#NULL!	#NULL!	#NULL!	#NULL!
#NULL!	#NULL!	#NULL!	#NULL!	#NULL!	#NULL!			#NULL!	#NULL!	#NULL!	#NULL!	#NULL!	#NULL!	#NULL!	#NULL!	#NULL!	#NULL!	#NULL!	#NULL!	#NULL!	#NULL!	#NULL!	#NULL!	#NULL!	#NULL!	#NULL!	#NULL!	#NULL!	#NULL!	#NULL!	#NULL!	#NULL!	#NULL!	#NULL!	#NULL!	#NULL!	#NULL!	#NULL!	#NULL!	#NULL!	#NULL!	#NULL!	#NULL!	#NULL!	#NULL!	#NULL!	#NULL!	#NULL!	#NULL!
#NULL!	#NULL!	#NULL!	#NULL!	#NULL!	#NULL!			#NULL!	#NULL!	#NULL!	#NULL!	#NULL!	#NULL!	#NULL!	#NULL!	#NULL!	#NULL!	#NULL!	#NULL!	#NULL!	#NULL!	#NULL!	#NULL!	#NULL!	#NULL!	#NULL!	#NULL!	#NULL!	#NULL!	#NULL!	#NULL!	#NULL!	#NULL!	#NULL!	#NULL!	#NULL!	#NULL!	#NULL!	#NULL!	#NULL!	#NULL!	#NULL!	#NULL!	#NULL!	#NULL!	#NULL!	#NULL!	#NULL!	#NULL!
#NULL!	#NULL!	#NULL!	#NULL!	#NULL!	#NULL!			#NULL!	#NULL!	#NULL!	#NULL!	#NULL!	#NULL!	#NULL!	#NULL!	#NULL!	#NULL!	#NULL!	#NULL!	#NULL!	#NULL!	#NULL!	#NULL!	#NULL!	#NULL!	#NULL!	#NULL!	#NULL!	#NULL!	#NULL!	#NULL!	#NULL!	#NULL!	#NULL!	#NULL!	#NULL!	#NULL!	#NULL!	#NULL!	#NULL!	#NULL!	#NULL!	#NULL!	#NULL!	#NULL!	#NULL!	#NULL!	#NULL!	#NULL!
#NULL!	#NULL!	#NULL!	#NULL!	#NULL!	#NULL!			#NULL!	#NULL!	#NULL!	#NULL!	#NULL!	#NULL!	#NULL!	#NULL!	#NULL!	#NULL!	#NULL!	#NULL!	#NULL!	#NULL!	#NULL!	#NULL!	#NULL!	#NULL!	#NULL!	#NULL!	#NULL!	#NULL!	#NULL!	#NULL!	#NULL!	#NULL!	#NULL!	#NULL!	#NULL!	#NULL!	#NULL!	#NULL!	#NULL!	#NULL!	#NULL!	#NULL!	#NULL!	#NULL!	#NULL!	#NULL!	#NULL!	#NULL!
#NULL!	#NULL!	#NULL!	#NULL!	#NULL!	#NULL!			#NULL!	#NULL!	#NULL!	#NULL!	#NULL!	#NULL!	#NULL!	#NULL!	#NULL!	#NULL!	#NULL!	#NULL!	#NULL!	#NULL!	#NULL!	#NULL!	#NULL!	#NULL!	#NULL!	#NULL!	#NULL!	#NULL!	#NULL!	#NULL!	#NULL!	#NULL!	#NULL!	#NULL!	#NULL!	#NULL!	#NULL!	#NULL!	#NULL!	#NULL!	#NULL!	#NULL!	#NULL!	#NULL!	#NULL!	#NULL!	#NULL!	#NULL!
#NULL!	#NULL!	#NULL!	#NULL!	#NULL!	#NULL!			#NULL!	#NULL!	#NULL!	#NULL!	#NULL!	#NULL!	#NULL!	#NULL!	#NULL!	#NULL!	#NULL!	#NULL!	#NULL!	#NULL!	#NULL!	#NULL!	#NULL!	#NULL!	#NULL!	#NULL!	#NULL!	#NULL!	#NULL!	#NULL!	#NULL!	#NULL!	#NULL!	#NULL!	#NULL!	#NULL!	#NULL!	#NULL!	#NULL!	#NULL!	#NULL!	#NULL!	#NULL!	#NULL!	#NULL!	#NULL!	#NULL!	#NULL!
#NULL!	#NULL!	#NULL!	#NULL!	#NULL!	#NULL!			#NULL!	#NULL!	#NULL!	#NULL!	#NULL!	#NULL!	#NULL!	#NULL!	#NULL!	#NULL!	#NULL!	#NULL!	#NULL!	#NULL!	#NULL!	#NULL!	#NULL!	#NULL!	#NULL!	#NULL!	#NULL!	#NULL!	#NULL!	#NULL!	#NULL!	#NULL!	#NULL!	#NULL!	#NULL!	#NULL!	#NULL!	#NULL!	#NULL!	#NULL!	#NULL!	#NULL!	#NULL!	#NULL!	#NULL!	#NULL!	#NULL!	#NULL!
#NULL!	#NULL!	#NULL!	#NULL!	#NULL!	#NULL!			#NULL!	#NULL!	#NULL!	#NULL!	#NULL!	#NULL!	#NULL!	#NULL!	#NULL!	#NULL!	#NULL!	#NULL!	#NULL!	#NULL!	#NULL!	#NULL!	#NULL!	#NULL!	#NULL!	#NULL!	#NULL!	#NULL!	#NULL!	#NULL!	#NULL!	#NULL!	#NULL!	#NULL!	#NULL!	#NULL!	#NULL!	#NULL!	#NULL!	#NULL!	#NULL!	#NULL!	#NULL!	#NULL!	#NULL!	#NULL!	#NULL!	#NULL!
#NULL!	#NULL!	#NULL!	#NULL!	#NULL!	#NULL!			#NULL!	#NULL!	#NULL!	#NULL!	#NULL!	#NULL!	#NULL!	#NULL!	#NULL!	#NULL!	#NULL!	#NULL!	#NULL!	#NULL!	#NULL!	#NULL!	#NULL!	#NULL!	#NULL!	#NULL!	#NULL!	#NULL!	#NULL!	#NULL!	#NULL!	#NULL!	#NULL!	#NULL!	#NULL!	#NULL!	#NULL!	#NULL!	#NULL!	#NULL!	#NULL!	#NULL!	#NULL!	#NULL!	#NULL!	#NULL!	#NULL!	#NULL!
#NULL!	#NULL!	#NULL!	#NULL!	#NULL!	#NULL!			#NULL!	#NULL!	#NULL!	#NULL!	#NULL!	#NULL!	#NULL!	#NULL!	#NULL!	#NULL!	#NULL!	#NULL!	#NULL!	#NULL!	#NULL!	#NULL!	#NULL!	#NULL!	#NULL!	#NULL!	#NULL!	#NULL!	#NULL!	#NULL!	#NULL!	#NULL!	#NULL!	#NULL!	#NULL!	#NULL!	#NULL!	#NULL!	#NULL!	#NULL!	#NULL!	#NULL!	#NULL!	#NULL!	#NULL!	#NULL!	#NULL!	#NULL!
#NULL!	#NULL!	#NULL!	#NULL!	#NULL!	#NULL!			#NULL!	#NULL!	#NULL!	#NULL!	#NULL!	#NULL!	#NULL!	#NULL!	#NULL!	#NULL!	#NULL!	#NULL!	#NULL!	#NULL!	#NULL!	#NULL!	#NULL!	#NULL!	#NULL!	#NULL!	#NULL!	#NULL!	#NULL!	#NULL!	#NULL!	#NULL!	#NULL!	#NULL!	#NULL!	#NULL!	#NULL!	#NULL!	#NULL!	#NULL!	#NULL!	#NULL!	#NULL!	#NULL!	#NULL!	#NULL!	#NULL!	#NULL!
#NULL!	#NULL!	#NULL!	#NULL!	#NULL!	#NULL!			#NULL!	#NULL!	#NULL!	#NULL!	#NULL!	#NULL!	#NULL!	#NULL!	#NULL!	#NULL!	#NULL!	#NULL!	#NULL!	#NULL!	#NULL!	#NULL!	#NULL!	#NULL!	#NULL!	#NULL!	#NULL!	#NULL!	#NULL!	#NULL!	#NULL!	#NULL!	#NULL!	#NULL!	#NULL!	#NULL!	#NULL!	#NULL!	#NULL!	#NULL!	#NULL!	#NULL!	#NULL!	#NULL!	#NULL!	#NULL!	#NULL!	#NULL!
#NULL!	#NULL!	#NULL!	#NULL!	#NULL!	#NULL!			#NULL!	#NULL!	#NULL!	#NULL!	#NULL!	#NULL!	#NULL!	#NULL!	#NULL!	#NULL!	#NULL!	#NULL!	#NULL!	#NULL!	#NULL!	#NULL!	#NULL!	#NULL!	#NULL!	#NULL!	#NULL!	#NULL!	#NULL!	#NULL!	#NULL!	#NULL!	#NULL!	#NULL!	#NULL!	#NULL!	#NULL!	#NULL!	#NULL!	#NULL!	#NULL!	#NULL!	#NULL!	#NULL!	#NULL!	#NULL!	#NULL!	#NULL!
[truncated: 81 more columns]
